# Supplementary material for: A marine heatwave drives massive losses from the world’s largest seagrass carbon stocks
Source: Springer Nature journal article supplement (doi:10.1038/s41558-018-0096-y), 2018-03-19
Supplement: 41558_2018_96_MOESM1_ESM.pdf [file 41558_2018_96_MOESM1_ESM.pdf]

In the format provided by the authors and unedited.

# A marine heatwave drives massive losses from the world's largest seagrass carbon stocks

A. Arias-Ortiz <sup>1\*</sup>, O. Serrano <sup>2,3</sup>, P. Masqué <sup>1,2,3</sup>, P. S. Lavery<sup>2,4</sup>, U. Mueller<sup>2</sup>, G. A. Kendrick <sup>3,5</sup>, M. Rozaimi <sup>2,6</sup>, A. Esteban<sup>2</sup>, J. W. Fourqurean <sup>5,7</sup>, N. Marbà<sup>8</sup>, M. A. Mateo<sup>2,4</sup>, K. Murray<sup>9</sup>, M. J. Rule<sup>3,9</sup> and C. M. Duarte<sup>8,10</sup>

<sup>1</sup>Institut de Ciència i Tecnologia Ambientals and Departament de Física, Universitat Autònoma de Barcelona, Barcelona, Spain. <sup>2</sup>School of Science & Centre for Marine Ecosystems Research, Edith Cowan University, Joondalup, WA, Australia. <sup>3</sup>The University of Western Australia Oceans Institute, The University of Western Australia, Crawley, WA, Australia. <sup>4</sup>Centre of Advanced Studies of Blanes (CEAB-CSIC), Blanes, Spain. <sup>5</sup>The School of Biological Sciences, The University of Western Australia, Crawley, WA, Australia. <sup>6</sup>School of Environmental and Natural Resource Sciences, Faculty of Science and Technology, Universiti Kebangsaan Malaysia, UKM Bangi, Selangor, Malaysia. <sup>7</sup>Department of Biological Sciences and Marine education and Research Center, Florida International University, Miami, FL, USA. <sup>8</sup>Global Change Research Group, IMEDEA (CSIC-UIB) Institut Mediterrani d'Estudis Avançats, Esporles, Mallorca, Spain. <sup>9</sup>Department of Biodiversity, Conservation and Attractions, Kensington, WA, Australia. <sup>10</sup>Red Sea Research Center (RSRC), King Abdullah University of Science and Technology, Thuwal, Saudi Arabia. \*e-mail: [Ariane.arias@uab.cat](mailto:Ariane.arias@uab.cat)

## Supplementary Discussion

Dry bulk density (DBD) of seagrass sediments sampled in Shark Bay had a wide range, from 0.06 to 1.86 g cm<sup>-3</sup>, with median and mean values (0.96 g cm<sup>-3</sup> and 0.94 ± 0.01 g cm<sup>-3</sup>, respectively) similar to those found in carbonate systems and in seagrass sediments worldwide (1.03 ± 0.02 g cm<sup>-3</sup>)<sup>1</sup>. Spatially, DBD increased westwards towards Peron Peninsula (Supplementary, Fig. S1), opposite to C content, with which it was negatively correlated ( $\rho = -0.69$ ;  $P \leq 0.001$ ) (Supplementary, Table S1). Grain size was dominated by medium sands (30% on average), followed by fine and coarse sands (21% and 20%, respectively on average). Mean particle diameter (d50) increased with depth ( $\rho = 0.25$ ;  $P \leq 0.001$ ), though spatially it did not show a significant correlation with longitude, similarly than exposure (measured as sand:mud ratio) ( $\rho = -0.48$ ;  $P = 0.08$  and  $\rho = -0.36$ ;  $P = 0.2$ , respectively). DBD was strongly negatively correlated with C, and positively correlated with sediment depth, particle size (d50) and sand:mud ratio. On the contrary, the correlation between particle size and C was weak ( $\rho = -0.13$ ;  $P \leq 0.05$ ) and between exposure and C was not significant ( $P > 0.05$ ) (Supplementary, Table S1), suggesting that the seagrass-derived C plays a large role in sediment C storage than does the accumulation of fine, organic-rich allochthonous particles<sup>2</sup>.

C burial rates are driven by sedimentation and by the C content available for storage. The high sediment C stocks in the Wooramel Bank and Faure Sill (average top meter: 245 ± 33 Mg C ha<sup>-1</sup>; average last 4,000 cal yr BP: 514 ± 45 Mg C ha<sup>-1</sup>) were supported by a 1.6-fold and 2-fold faster accretion of sediments (2.8 - 1.1 mm yr<sup>-1</sup> compared to the 1.7 - 0.5 mm yr<sup>-1</sup> measured in meadows at Peron Peninsula), in the short- and long-terms, respectively, and by a 2.7-fold higher concentration of C relative to the other sites surveyed (Table 1)<sup>3</sup>. The rapid sediment accumulation rates would have contributed to higher accumulation and preservation of C after burial<sup>4</sup> due to the prevention of oxygen exchange and limitation of redox potentials, which reduce remineralization<sup>5</sup>. This, together with the recalcitrant nature of seagrass-derived C<sup>6</sup>

available for storage led to the formation of these organic-rich sediment deposits within South Wooramel and Faure Sill seagrass banks.

## Supplementary Figures

a) DBD dry bulk density ( $\text{g}/\text{cm}^3$ )

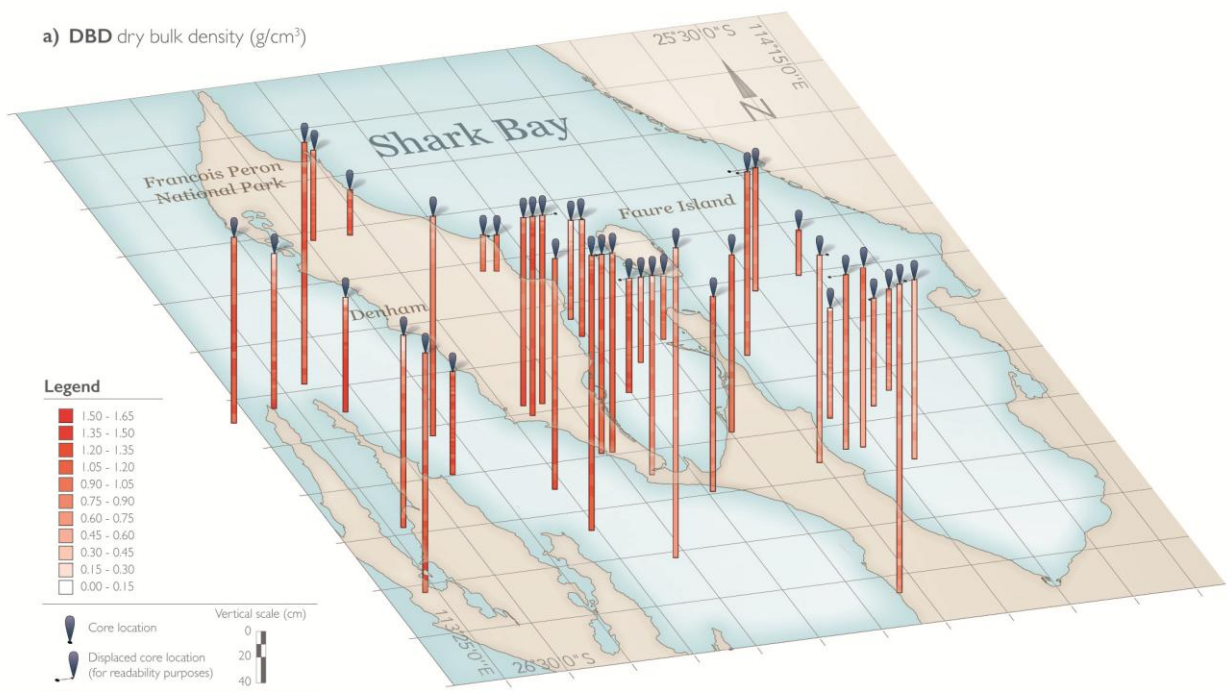

b) d50 ( $\mu\text{m}$ )

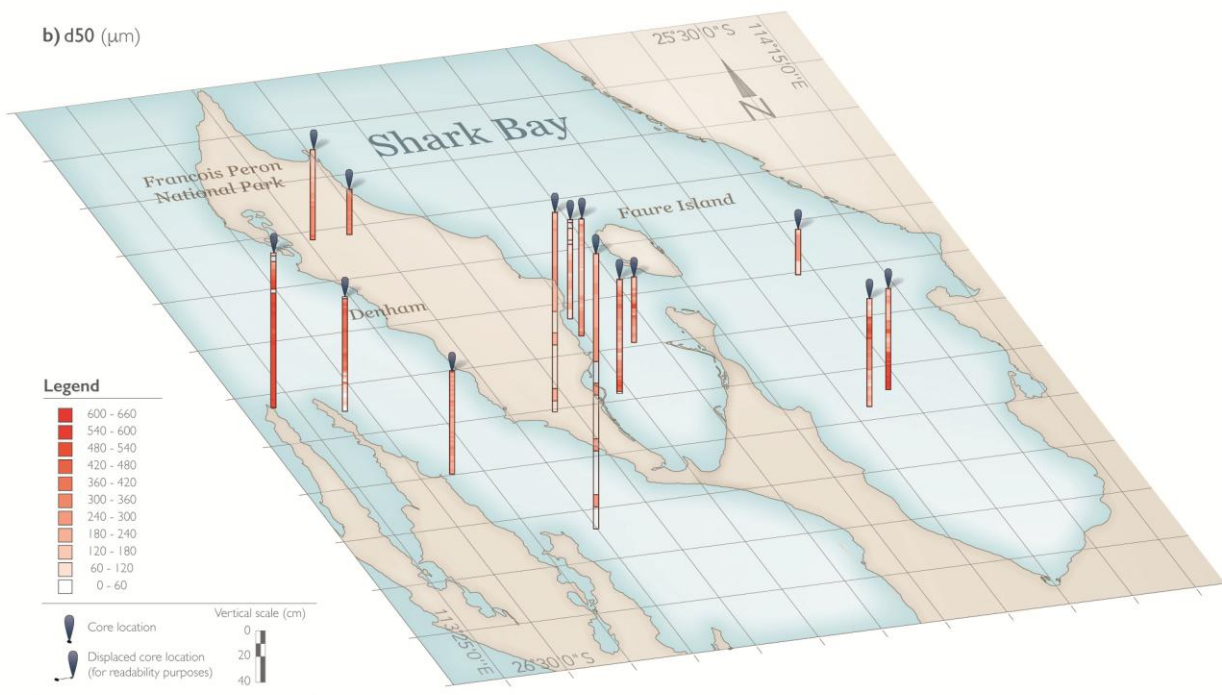

**Figure S1. Spatial distribution of sediment properties. (a) Dry bulk density (DBD) and (b) d50 (median diameter of particles) measured in seagrass sediments of Shark Bay.**

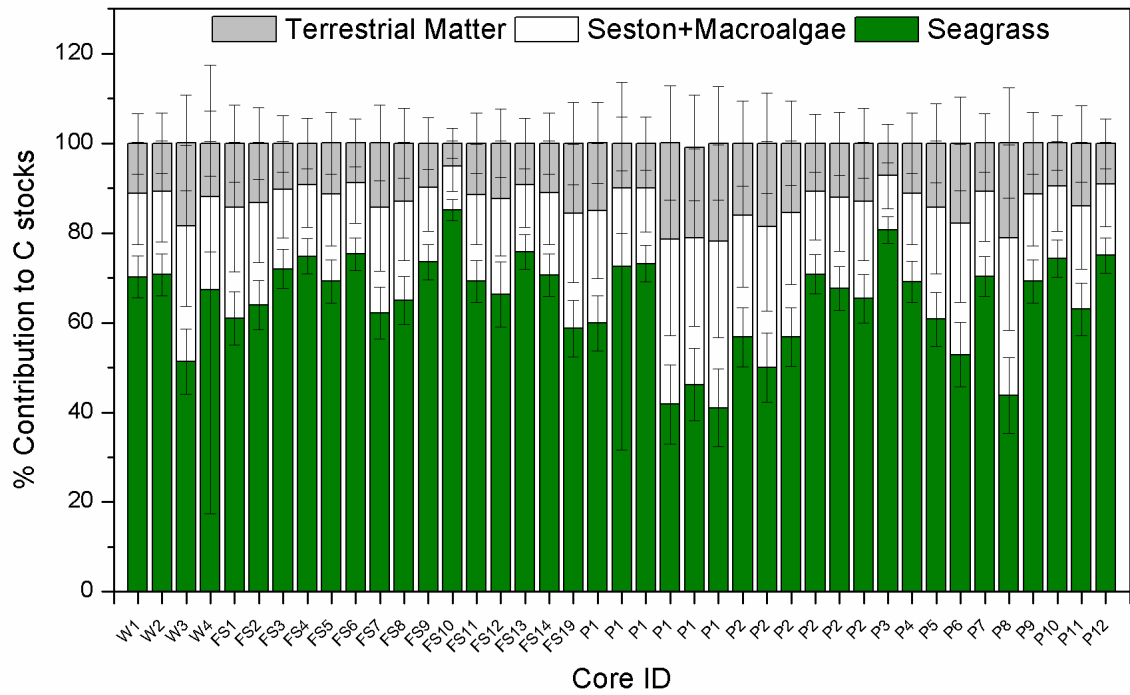

**Figure S2. Percentage contribution of seagrass, seston and macroalgae and terrestrial matter to the sediment organic carbon (C) pools in Shark Bay.**

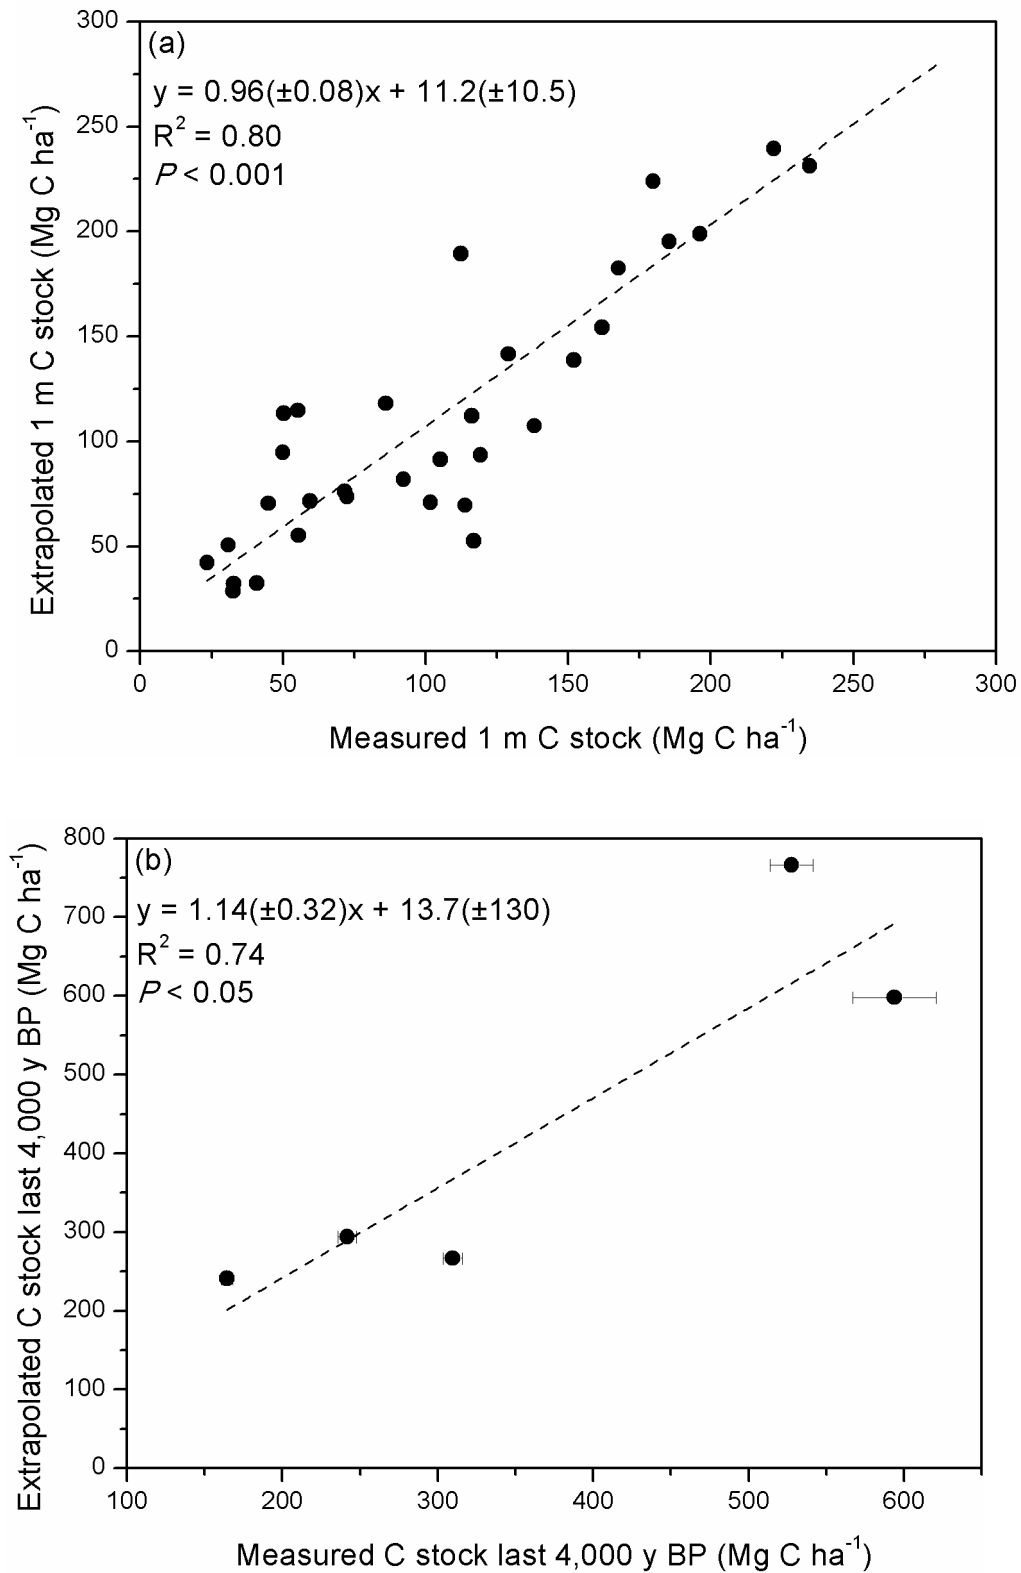

**Figure S3. Relationship between extrapolated and measured organic carbon (C) stocks.** (a) From 25 cm to 100 cm in sediment cores  $\geq 1$  m depth; (b) Accumulated over the last 2,000 to 4,000 yr in cores dating  $\geq 4,000$  cal yr BP.

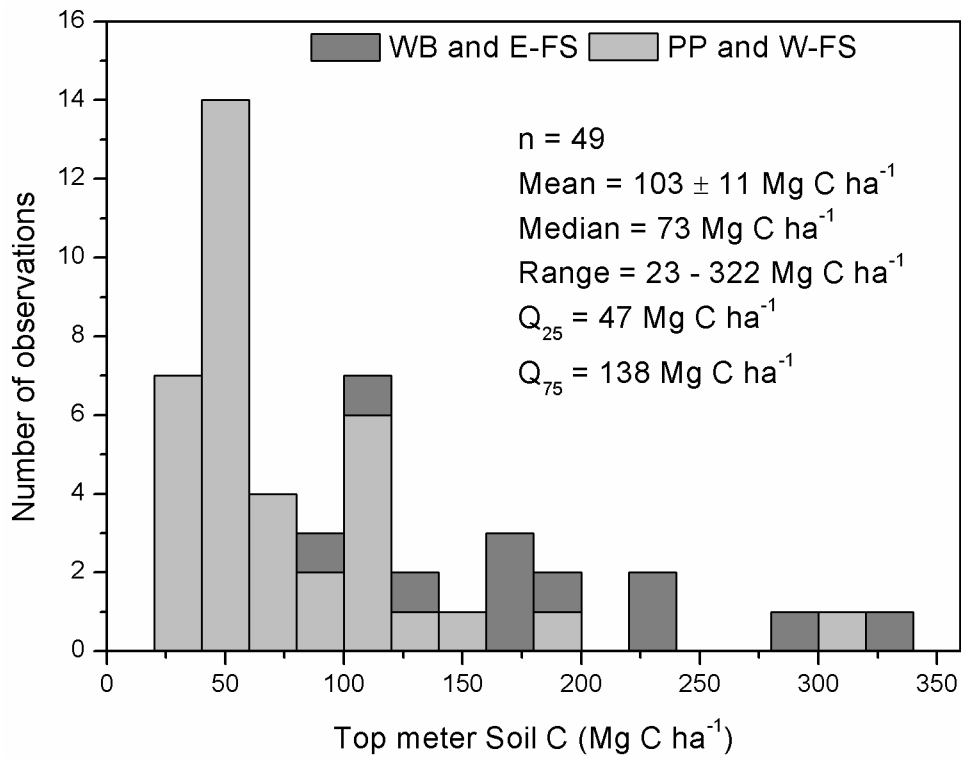

**Figure S4. Frequency distribution of published and calculated observations of top meter sediment organic carbon (C) stocks in seagrass sediments in Shark Bay.**

Different shading is given to highlight spatial patterns. Light grey indicates observations from Peron Peninsula and West Faure Sill. Dark grey, Wooramel Bank and East Faure Sill.

## Supplementary Tables

**Table S1. Spearman correlation coefficients between sediment organic carbon (C) concentration (%) and physicochemical and biological variables determined in seagrass cores of Shark Bay. \*\*\* $P \leq 0.001$ , \*\* $P \leq 0.01$ , \* $P \leq 0.05$ , NS,  $P \geq 0.05$ ; significant correlations ( $P \leq 0.05$ ) in bold ( $\rho$  value).**

|                       | n    | Depth        | DBD          | %C           | $\delta^{13}\text{C}$ | d50          | % Mud        | %Sand       | Sand:Mud |
|-----------------------|------|--------------|--------------|--------------|-----------------------|--------------|--------------|-------------|----------|
| Depth                 | 1102 |              | ***          | ***          | ***                   | ***          | NS           | NS          | NS       |
| DBD                   | 1102 | <b>0.32</b>  |              | ***          | ***                   | ***          | ***          | ***         | ***      |
| %C                    | 1102 | <b>-0.24</b> | <b>-0.69</b> |              | ***                   | *            | NS           | NS          | NS       |
| $\delta^{13}\text{C}$ | 854  | <b>-0.26</b> | <b>-0.25</b> | <b>0.34</b>  |                       | ***          | ***          | ***         | ***      |
| d50                   | 369  | <b>0.25</b>  | <b>0.29</b>  | <b>-0.13</b> | <b>-0.20</b>          |              | ***          | ***         | ***      |
| % Mud                 | 369  | -0.06        | <b>-0.31</b> | 0.03         | <b>0.31</b>           | <b>-0.72</b> |              |             | ***      |
| %Sand                 | 369  | 0.06         | <b>0.31</b>  | -0.04        | <b>-0.31</b>          | <b>0.72</b>  |              |             | ***      |
| Sand:Mud              | 369  | 0.06         | <b>0.29</b>  | -0.02        | <b>-0.31</b>          | <b>0.71</b>  | <b>-0.98</b> | <b>0.98</b> |          |



**Table S2. Sediment  $\delta^{13}\text{C}$  descriptive statistics estimated for the entire length (no older than 4,000 cal yr BP) of the seagrass sediment cores and putative sources of organic carbon (C) in Shark Bay. Same labels are used for cores with same coordinates sampled ~10 m apart from one another.**

| Core ID | Sections |       |     | $\delta^{13}\text{C}(\text{‰})$ |        |         |
|---------|----------|-------|-----|---------------------------------|--------|---------|
|         | n        | Mean  | SD  | Minimum                         | Median | Maximum |
| W1      | 21       | -12.9 | 0.4 | -13.8                           | -12.9  | -12.2   |
| W2      | 23       | -12.8 | 0.6 | -13.6                           | -12.9  | -11.3   |
| W3      | 38       | -15.1 | 2.0 | -19.9                           | -14.8  | -11.5   |
| W4      | 7        | -13.2 | 0.3 | -13.8                           | -13.1  | -12.9   |
| FS1     | 31       | -13.9 | 1.3 | -15.7                           | -14.5  | -11.6   |
| FS2     | 25       | -13.6 | 1.5 | -15.6                           | -13.7  | -10.3   |
| FS3     | 25       | -12.7 | 1.1 | -15.5                           | -12.6  | -9.6    |
| FS4     | 24       | -12.3 | 1.4 | -13.9                           | -13.0  | -9.9    |
| FS5     | 25       | -13.0 | 1.0 | -14.5                           | -13.2  | -10.9   |
| FS6     | 24       | -12.3 | 1.1 | -14.3                           | -12.3  | -10.3   |
| FS7     | 34       | -13.8 | 1.0 | -15.2                           | -14.0  | -10.9   |
| FS8     | 37       | -13.5 | 0.8 | -16.3                           | -13.3  | -12.4   |
| FS9     | 41       | -12.4 | 1.4 | -18.9                           | -12.3  | -9.9    |
| FS10    | 10       | -11.1 | 0.9 | -12.5                           | -11.3  | -9.0    |
| FS11    | 21       | -12.9 | 2.1 | -21.1                           | -12.8  | -9.3    |
| FS12    | 24       | -13.3 | 1.0 | -14.5                           | -13.5  | -9.6    |
| FS13    | 37       | -12.2 | 0.8 | -13.6                           | -12.4  | -8.9    |
| FS14    | 32       | -12.8 | 1.0 | -15.6                           | -12.8  | -11.2   |
| FS19    | 29       | -14.2 | 1.0 | -15.8                           | -14.3  | -12.1   |
| P1      | 5        | -14.1 | 0.2 | -14.4                           | -14.1  | -13.9   |
| P1      | 4        | -12.6 | 0.9 | -13.3                           | -12.9  | -11.3   |
| P1      | 5        | -12.5 | 0.8 | -13.6                           | -12.2  | -11.8   |
| P1      | 5        | -16.2 | 1.2 | -18.0                           | -16.3  | -15.1   |
| P1      | 5        | -15.7 | 1.6 | -17.8                           | -16.0  | -13.7   |
| P1      | 5        | -16.3 | 1.2 | -17.5                           | -16.3  | -14.3   |
| P2      | 5        | -14.4 | 0.8 | -15.7                           | -14.0  | -13.9   |
| P2      | 5        | -15.2 | 1.7 | -18.0                           | -14.8  | -13.5   |
| P2      | 5        | -14.4 | 0.8 | -15.1                           | -14.5  | -13.0   |
| P2      | 5        | -12.8 | 1.2 | -14.1                           | -12.5  | -11.7   |
| P2      | 5        | -13.2 | 0.5 | -13.8                           | -13.0  | -12.7   |
| P2      | 5        | -13.4 | 1.0 | -14.5                           | -14.0  | -12.2   |
| P3      | 24       | -11.7 | 0.7 | -12.7                           | -11.9  | -10.0   |
| P4      | 27       | -13.0 | 1.1 | -14.3                           | -13.4  | -9.7    |
| P5      | 34       | -14.0 | 1.3 | -15.8                           | -14.4  | -9.9    |
| P6      | 30       | -14.9 | 2.2 | -18.5                           | -15.3  | -9.3    |
| P7      | 31       | -12.9 | 1.7 | -15.8                           | -13.1  | -10.0   |
| P8      | 17       | -16.0 | 2.5 | -21.3                           | -16.0  | -12.4   |

**Table S2 continued**

|                           |    |        |        |       |                                     |       |
|---------------------------|----|--------|--------|-------|-------------------------------------|-------|
| P9                        | 28 | -13.0  | 1.1    | -14.4 | -13.5                               | -10.8 |
| P10                       | 22 | -12.4  | 3.6    | -21.1 | -11.1                               | -8.9  |
| P11                       | 23 | -13.7  | 1.1    | -16.1 | -13.8                               | -12.0 |
| P12                       | 50 | -12.3  | 1.8    | -16.6 | -12.0                               | -8.9  |
| <b>Seagrass mean*</b>     |    | -9.41  | ± 1.32 |       | Burkholder et al. 2011 <sup>7</sup> |       |
| <b>Macroalgae mean</b>    |    | -18.12 | ± 3.93 |       | Burkholder et al. 2011 <sup>7</sup> |       |
| <b>Seston</b>             |    | -19.3  | ± 2.05 |       | Cawley et al. 2012 <sup>8</sup>     |       |
| <b>Wooramel river DOM</b> |    | -25.08 |        |       | Cawley et al. 2012 <sup>8</sup>     |       |

\* Mean of all seagrass organs from tropical and temperate species in the Bay.

**Table S3. Top meter sediment organic carbon (C) stocks, location and main features of sampled seagrass meadows.** Number of deep-cores, water column depth and sediment depth after compression corrections. Same labels are used for cores with same coordinates sampled ~10 m apart from one another.

| Core ID | Latitude | Longitude | Site          | Water depth<br>(m) | Seagrass Species                                          | Core length<br>(cm) | Top meter C stock<br>(Mg C ha <sup>-1</sup> ) |
|---------|----------|-----------|---------------|--------------------|-----------------------------------------------------------|---------------------|-----------------------------------------------|
| W1      | -25.9526 | 114.1838  | Wooramel Bank | 3.0                | <i>Amphibolis</i> spp                                     | 232                 | 111                                           |
| W2      | -25.9230 | 114.1458  | Wooramel Bank | 1.5                | <i>Amphibolis</i> spp                                     | 205                 | 124                                           |
| W3      | -25.9626 | 114.1561  | Wooramel Bank | 1.5                | <i>Amphibolis</i> spp                                     | 199                 | 220                                           |
| W4      | -25.8500 | 114.1020  | Wooramel Bank | 3.2                | <i>Amphibolis</i> spp                                     | 206                 | 322                                           |
| W5      | -25.7413 | 114.0746  | Wooramel Bank | 1.0                | <i>Halodule uninervis</i> , <i>Amphibolis antarctica</i>  | 103                 | 169                                           |
| W6      | -25.7448 | 114.0797  | Wooramel Bank | 0.9                | <i>Halodule uninervis</i> , <i>Amphibolis antarctica</i>  | 55                  | 185                                           |
| W7      | -25.9565 | 114.1741  | Wooramel Bank | 4.3                | <i>Halodule uninervis</i> , <i>Amphibolis antarctica</i>  | 138                 | 162                                           |
| W8      | -25.8940 | 114.1140  | Wooramel Bank | 3.0                | <i>Halodule uninervis</i>                                 | 100                 | 235                                           |
| FS1     | -25.8476 | 113.8352  | Faure Sill    | 1.5                | <i>Posidonia australis</i>                                | 323                 | 50                                            |
| FS2     | -25.8474 | 113.8356  | Faure Sill    | 1.5                | <i>Posidonia australis</i>                                | 311                 | 49                                            |
| FS3     | -25.8426 | 113.8359  | Faure Sill    | 1.5                | <i>Posidonia australis</i>                                | 275                 | 32                                            |
| FS4     | -25.7719 | 113.8227  | Faure Sill    | 0.5                | <i>Posidonia australis</i>                                | 249                 | 72                                            |
| FS5     | -25.7723 | 113.8236  | Faure Sill    | 0.5                | <i>Posidonia australis</i>                                | 269                 | 54                                            |
| FS6     | -25.7726 | 113.8250  | Faure Sill    | 0.5                | <i>Posidonia australis</i>                                | 256                 | 113                                           |
| FS7     | -25.9747 | 114.1240  | Faure Sill    | 2.5                | <i>Posidonia sinuosa</i>                                  | 202                 | 91                                            |
| FS8     | -25.9789 | 114.0684  | Faure Sill    | 2.5                | <i>Amphibolis</i> spp                                     | 207                 | 111                                           |
| FS9     | -25.8894 | 113.8410  | Faure Sill    | 3.0                | <i>Posidonia australis</i> , <i>Amphibolis antarctica</i> | 263                 | 101                                           |
| FS10    | -25.8893 | 113.8412  | Faure Sill    | 3.0                | <i>Posidonia australis</i> , <i>Amphibolis antarctica</i> | 75                  | 81                                            |
| FS11    | -25.8894 | 113.8409  | Faure Sill    | 4.0                | <i>Posidonia australis</i> , <i>Amphibolis antarctica</i> | 83                  | 313                                           |
| FS12    | -25.8900 | 113.8407  | Faure Sill    | 4.0                | <i>Amphibolis antarctica</i>                              | 230                 | 39                                            |
| FS13    | -25.7870 | 113.8516  | Faure Sill    | 2.0                | <i>Posidonia australis</i>                                | 261                 | 104                                           |
| FS14    | -25.7870 | 113.8518  | Faure Sill    | 2.0                | <i>Posidonia australis</i>                                | 146                 | 118                                           |

**Table S3 continued**

|      |          |          |                 |     |                                                  |     |     |
|------|----------|----------|-----------------|-----|--------------------------------------------------|-----|-----|
| FS15 | -25.9306 | 114.0961 | Faure Sill      | 1.7 | <i>Amphibolis antarctica</i>                     | 99  | 180 |
| FS16 | -25.8746 | 113.9992 | Faure Sill      | 0.7 | <i>Amphibolis antarctica</i>                     | 99  | 86  |
| FS17 | -25.9378 | 113.9364 | Faure Sill      | 2.0 | <i>Amphibolis antarctica</i>                     | 109 | 281 |
| FS18 | -25.8513 | 113.9380 | Faure Sill      | 2.0 | <i>Halodule uninervis, Amphibolis antarctica</i> | 139 | 168 |
| FS19 | -25.8449 | 113.7821 | Faure Sill      | 2.0 | <i>Amphibolis antarctica</i>                     | 274 | 31  |
| P1   | -25.7942 | 113.7224 | Peron Peninsula | 0.5 | <i>Posidonia australis</i>                       | 27  | 45  |
| P1   | -25.7942 | 113.7224 | Peron Peninsula | 0.5 | <i>Posidonia australis</i>                       | 27  | 62  |
| P1   | -25.7942 | 113.7224 | Peron Peninsula | 0.5 | <i>Amphibolis antarctica</i>                     | 27  | 30  |
| P1   | -25.7942 | 113.7224 | Peron Peninsula | 0.5 | <i>Amphibolis antarctica</i>                     | 27  | 26  |
| P1   | -25.7942 | 113.7224 | Peron Peninsula | 0.5 | <i>Posidonia australis</i>                       | 27  | 51  |
| P1   | -25.7942 | 113.7224 | Peron Peninsula | 0.5 | <i>Amphibolis antarctica</i>                     | 27  | 29  |
| P2   | -25.7927 | 113.7189 | Peron Peninsula | 1.0 | <i>Amphibolis antarctica</i>                     | 27  | 42  |
| P2   | -25.7927 | 113.7189 | Peron Peninsula | 1.0 | <i>Amphibolis antarctica</i>                     | 27  | 47  |
| P2   | -25.7927 | 113.7189 | Peron Peninsula | 1.0 | <i>Amphibolis antarctica</i>                     | 27  | 42  |
| P2   | -25.7927 | 113.7189 | Peron Peninsula | 1.0 | <i>Posidonia australis</i>                       | 27  | 57  |
| P2   | -25.7927 | 113.7189 | Peron Peninsula | 1.0 | <i>Posidonia australis</i>                       | 27  | 63  |
| P2   | -25.7927 | 113.7189 | Peron Peninsula | 1.0 | <i>Posidonia australis</i>                       | 27  | 58  |
| P3   | -25.9358 | 113.5277 | Peron Peninsula | 1.5 | <i>Posidonia australis</i>                       | 246 | 70  |
| P4   | -25.9668 | 113.5387 | Peron Peninsula | 2.0 | <i>Amphibolis antarctica</i>                     | 251 | 54  |
| P5   | -26.0021 | 113.5546 | Peron Peninsula | 3.0 | <i>Amphibolis antarctica</i>                     | 248 | 150 |
| P6   | -25.6071 | 113.5883 | Peron Peninsula | 1.5 | <i>Amphibolis antarctica, Posidonia spp</i>      | 289 | 30  |
| P7   | -25.6209 | 113.5897 | Peron Peninsula | 1.5 | <i>Amphibolis antarctica, Posidonia spp</i>      | 273 | 137 |
| P8   | -25.6914 | 113.5986 | Peron Peninsula | 2.5 | <i>Amphibolis antarctica</i>                     | 99  | 59  |
| P9   | -25.7524 | 113.6733 | Peron Peninsula | 2.0 | <i>Amphibolis antarctica, Posidonia spp</i>      | 259 | 44  |
| P10  | -25.8635 | 113.4928 | Peron Peninsula | 1.5 | <i>Posidonia sinuosa</i>                         | 275 | 110 |
| P11  | -25.7419 | 113.4157 | Peron Peninsula | 2.0 | <i>Amphibolis antarctica</i>                     | 214 | 23  |
| P12  | -25.7779 | 113.4483 | Peron Peninsula | 1.5 | <i>Posidonia australis</i>                       | 280 | 194 |

**Table S4. Estimates of seagrass sediment thicknesses accumulated over the last 4,000 cal yr BP based on radiocarbon results.** The total thickness of sediments surveyed and the age of the bottom sections are indicated, together with the % of sampled sediment thickness encompassing the last 4,000 yr.

| Core ID | Total thickness surveyed (cm) | Age of bottom section (cal yr BP) |   |     | Estimated sediment thickness (4,000 cal yr BP) |   |    | % of sampled sediment thickness encompassing 4,000 cal yr BP |
|---------|-------------------------------|-----------------------------------|---|-----|------------------------------------------------|---|----|--------------------------------------------------------------|
| W3      | 199                           | 3404                              | ± | 444 | 234                                            | ± | 18 | 85                                                           |
| W4      | 206                           | 1911                              | ± | 587 | 431                                            | ± | 84 | 48                                                           |
| FS7     | 202                           | 1367                              | ± | 54  | 591                                            | ± | 11 | 34                                                           |
| FS9     | 263                           | 3563                              | ± | 123 | 295                                            | ± | 9  | 89                                                           |
| FS13    | 261                           | 3757                              | ± | 96  | 278                                            | ± | 5  | 94                                                           |
| FS14    | 146                           | 1117                              | ± | 61  | 523                                            | ± | 16 | 28                                                           |
| P5      | 248                           | 5816                              | ± | 159 | 171                                            | ± | 1  | 145                                                          |
| P7      | 273                           | 4125                              | ± | 86  | 265                                            | ± | 1  | 103                                                          |
| P8      | 99                            | 2538                              | ± | 68  | 156                                            | ± | 1  | 63                                                           |
| P10     | 275                           | 6989                              | ± | 227 | 157                                            | ± | 5  | 175                                                          |
| P12     | 280                           | 3777                              | ± | 170 | 296                                            | ± | 10 | 94                                                           |

### Supplementary References

1. Fourqurean, J. W. *et al.* Seagrass ecosystems as a globally significant carbon stock. *Nat. Geosci.* **5**, 505–509 (2012).
2. Serrano, O. *et al.* Can mud (silt and clay) concentration be used to predict soil organic carbon content within seagrass ecosystems? *Biogeosciences* **13**, 4915–4926 (2016).
3. Arias-Ortiz, A. *et al.* *A marine heat wave drives massive losses from the world's largest seagrass carbon stocks [dataset]*. Edith Cowan University. <http://dx.doi.org/10.4225/75/5a1640e851af1> (2017).
4. Serrano, O. *et al.* Key biogeochemical factors affecting soil carbon storage in Posidonia meadows. *Biogeosciences* **13**, 4581–4594 (2016).
5. Keil, R. G. & Hedges, J. I. Sorption of organic matter to mineral surfaces and the preservation of organic matter in coastal marine sediments. *Chem. Geol.* **107**, 385–388 (1993).
6. Trevathan-Tackett, S. M. *et al.* Comparison of marine macrophytes for their contributions to blue carbon sequestration. *Ecology* **96**, 3043–3057 (2015).
7. Burkholder, D. A., Heithaus, M. R., Thomson, J. A. & Fourqurean, J. W. Diversity in trophic interactions of green sea turtles *Chelonia mydas* on a relatively pristine coastal foraging ground. *Mar. Ecol. Prog. Ser.* **439**, 277–293 (2011).
8. Cawley, K. M., Ding, Y., Fourqurean, J. & Jaffé, R. Characterising the sources and fate of dissolved organic matter in Shark Bay, Australia: A preliminary study using optical properties and stable carbon isotopes. *Mar. Freshw. Res.* **63**, 1098–1107 (2012).
